# Supplementary material for: Influence of cobalt content on the electrochemical properties of sheet-like 0.5Li2MnO3·0.5LiNi1/3+xCo1/3−2xMn1/3+xO2 as lithium ion battery cathodes
Source: Royal Society of Chemistry journal article supplement (doi:10.1039/c2ra22690a), 2012-12-06
Supplement: c2ra22690a.pdf [file c2ra22690a.pdf]

## Supporting information

### **Influence of cobalt content on the electrochemical properties of sheet-like $0.5\text{Li}_2\text{MnO}_3 \cdot 0.5\text{LiNi}_{1/3+x}\text{Co}_{1/3-2x}\text{Mn}_{1/3+x}\text{O}_2$ as lithium ion battery cathodes**

Chenhao Zhao, Wenpei Kang, Rui Liu and Qiang Shen\*

\*Corresponding author.

Tel.: +86-531-88361387; fax: +86-531-88364464; e-mail: [qshen@sdu.edu.cn](mailto:qshen@sdu.edu.cn).

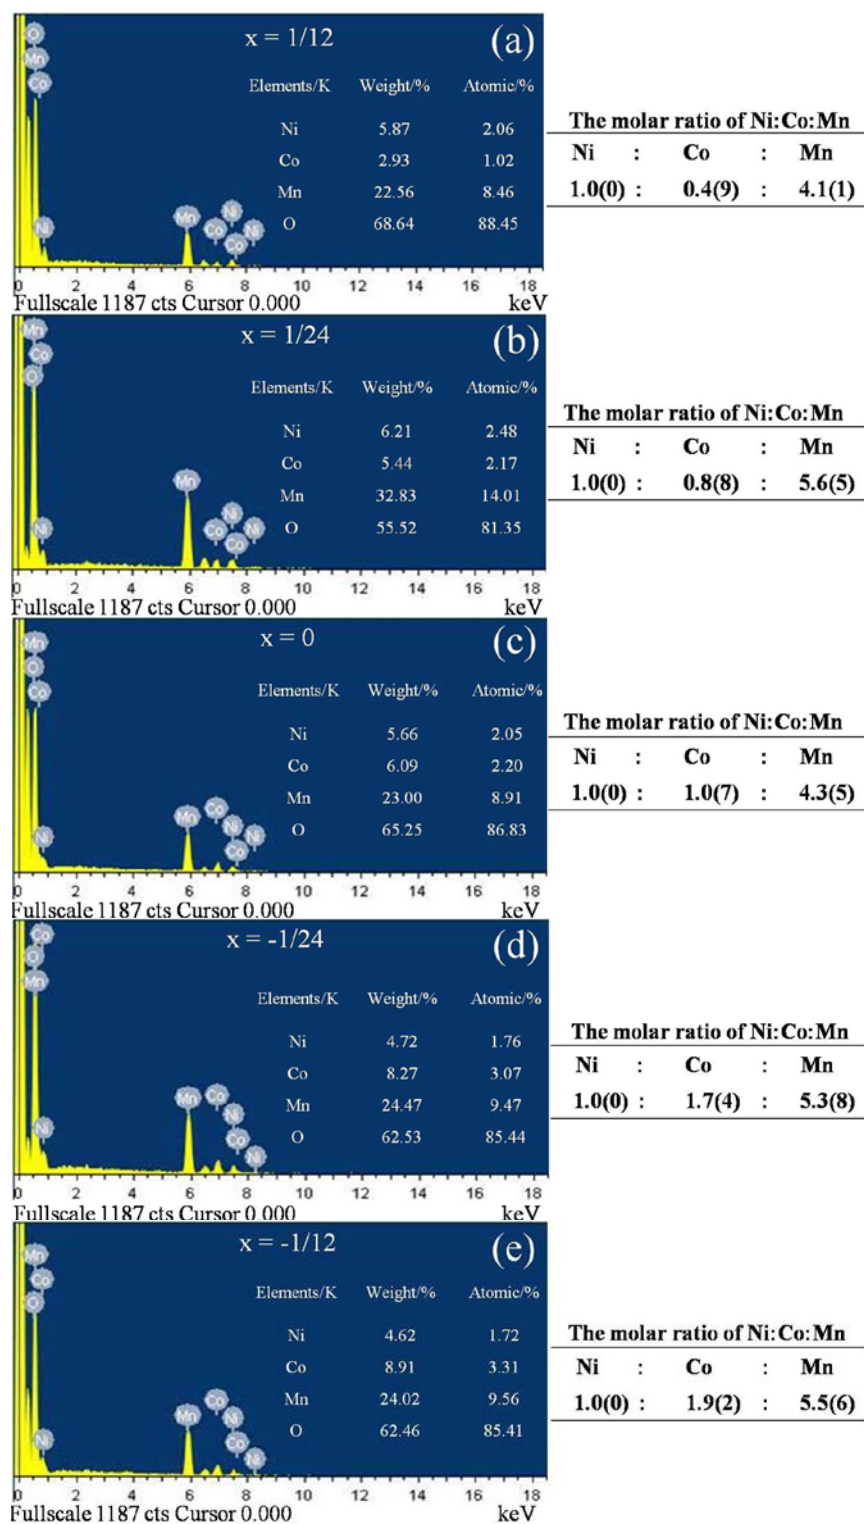

**Fig. S1.** EDX analysis of powdered  $0.5\text{Li}_2\text{MnO}_3 \cdot 0.5\text{LiNi}_{1/3+x}\text{Co}_{1/3-2x}\text{Mn}_{1/3+x}\text{O}_2$  samples obtained at the  $x$  value of (a)  $1/12$ , (b)  $1/24$ , (c)  $0$ , (d)  $-1/24$  and (e)  $-1/12$ .

**Tab. S1.** XRD data analysis of crystalline  $0.5\text{Li}_2\text{MnO}_3 \cdot 0.5\text{LiNi}_{1/3+x}\text{Co}_{1/3-2x}\text{Mn}_{1/3+x}\text{O}_2$ .

|             | $I_{(003)}$ | $I_{(110)}$ | $I_{(110)}/I_{(003)}$ | $2\theta_{(110)}$ |
|-------------|-------------|-------------|-----------------------|-------------------|
| $x = 1/12$  | 2743        | 404         | 0.15                  | 65.4              |
| $x = 1/24$  | 3461        | 635         | 0.18                  | 65.5              |
| $x = 0$     | 3089        | 678         | 0.22                  | 65.5              |
| $x = -1/24$ | 2813        | 739         | 0.26                  | 65.5              |
| $x = -1/12$ | 3185        | 774         | 0.25                  | 65.6              |

Note:  $I_{(hkl)}$  represents XRD peak intensity (i.e., peak area) with a subscript index of corresponding crystal plane;  $2\theta$  denotes peak position.
